# Supplementary material for: SfgA Renders Aspergillus flavus More Stable to the External Environment
Source: MDPI journal article supplement (doi:10.3390/jof8060638), 2022-06-16
Supplement: s1 [file s1]

## Supplementary Materials

**Table S1.** Primers used for constructing *sfgA* deletion and over-expression strains.

| Name | Sequence                                               |
|------|--------------------------------------------------------|
| P1   | GCTATGCCCAAAGGGTTCG                                    |
| P2   | CGAACTCATCACCACCGGGAGGGACGTAGATATGTCGGAGGA             |
| P3   | TCCCGGTGGTGATGAGTTCG                                   |
| P4   | CCCGTGACATGTGAATGCGG                                   |
| P5   | CCGCATTCACATGTCACGGGTCGTCTACTACCCATAACAACCTCCC         |
| P6   | CATTCTGAACATCATCTGGCTTCC                               |
| P7   | GGCGTGAATCCTTTTGAGACC                                  |
| P8   | GGAGCAAGCCGTTCCAGTTC                                   |
| P9   | GCTATGCCCAAAGGGTTCGGGATCT                              |
| P10  | GAGGTGAGATGGGATTGGTATAGGA                              |
| P11  | TCCTATACCAATCCCATCTCACCTCTCCCGGTGGTGATGAGTTCGGTAG<br>A |
| P12  | CCCGTGACATGTGAATGCGGGCACC                              |
| P13  | GGTGCCCGCATTCACATGTCACGGGCATCCGGATGTCGAAGGCTTGG<br>GGC |
| P14  | CATTGTGATGTCTGCTCAAGCGGGG                              |
| P15  | CCCCGCTTGAGCAGACATCACAATGATGGAGATCCAAACGGTAGTCT<br>GCG |
| P16  | TCACGGAAGGAGAATCGAAGACCGA                              |
| P17  | TCGGCGTGAATCCTTTTGAGACCACA                             |
| P18  | GAGTAGACGATATATCTCACGAGCACCT                           |
| P19  | TTGTTATTCAGAGCGTGGGACTAAGG                             |
| P20  | AGAAGTAGCAGTGTGAGAAGTGTATCG                            |
| P21  | GGCTTCCAGATCACTTCGGAACCTG                              |
| P22  | AAGAACACCGCAATCGCAATCGTA                               |
| P23  | CGGATGACTGTCGAACTGCATGATAGAG                           |
| P24  | AGAACACCGCAATCGCAATCGTAGC                              |
| P25  | ACTAGATAGTAGACAGGTAGGACACGAT                           |
| P26  | AGAGTCAACAGCAGCAACAAGAGA                               |
| P27  | CCAAATATCGTGCCTCTCCTGCTTT                              |
| P28  | GCTTGAATCTCCATCATCACTGACCAA                            |
| P29  | CTGTGCAAGATGTTCTCGAATGCCGCTA                           |
| P30  | CTCGATACAGCCCGCATATTCCAAGACC                           |

**Table S2.** Primers used for qPCR.

| Name    | Sequence                |
|---------|-------------------------|
| actin-F | AGGACTCTTATGTCCGGTGATG  |
| actin-R | CGGTTGGACTTAGGGTTG      |
| sfgA-F  | CGCCAAGCCGAAATGAACCAC   |
| sfgA-R  | GTTATATTCCCAGCCGCCACC   |
| aflC-F  | TGTCAGACCACAAACGCACCT   |
| aflC-R  | CATCTCACAGAACGCCCTCAA   |
| aflD-F  | CGCCTGAGGAGACGGTGTATT   |
| aflD-R  | CTGCCTTCAGCGACGGTTAG    |
| aflB-F  | TCAAGCCCGTACCATTCATCC   |
| aflB-R  | ATTACCGCCTCCACATCTTCG   |
| aflA-F  | CCTCCCTCTGATGCCGGTGA    |
| aflA-R  | ATTTCAATGCAGCGACCCGAT   |
| aflR-F  | GCAGTCAATGGAACACGGAAAC  |
| aflR-R  | CCTGAAACGGTGGTAGTGGG    |
| aflS-F  | CTGACCATCTCCGACCCGTTC   |
| aflS-R  | AGAGCCAACTGTCGGACCAA    |
| aflH-F  | CACCCCACTGATTGCGCCTA    |
| aflH-R  | ATCGCCTCCCCAACCATACTCG  |
| aflJ-F  | CTGCGTTGCTACACTCCCC     |
| aflJ-R  | ATCACGCGGCAGAAACCATC    |
| aflE-F  | ACAGAAGAACACCAAGGCTAC   |
| aflE-R  | CGGATTCCTCCTCGCTCAG     |
| aflM-F  | CCGTTTAGATGGCAAAGTGGC   |
| aflM-R  | TCACGGGAATGGGCGTAGTT    |
| aflN-F  | ACCTTCCTATGCCAGAGTTCA   |
| aflN-R  | AATCATCCAGGTCCCGCTA     |
| aflG-F  | GACTCGTTCGGCTGCCTTGA    |
| aflG-R  | GTTCCGGCGTCGCTGTTCTA    |
| aflL-F  | CCGACAAGTTCATCCCCGAG    |
| aflL-R  | TGCGCCCAATACAGTTCCG     |
| aflI-F  | CTTCGCATTCAAATCCTCGTT   |
| aflI-R  | CGCACATGAACACAATACTAGCA |

**Table S3.** Reads and reference genome comparison.

| <b>Sample</b>    | <b>Total Reads</b> | <b>Mapped Reads</b> | <b>Mapping Rate (%)</b> |
|------------------|--------------------|---------------------|-------------------------|
| CK30_1           | 49,725,142         | 47,130,952          | 94.78                   |
| CK30_2           | 46,968,204         | 43,200,080          | 91.98                   |
| CK30_3           | 41,459,326         | 40,064,515          | 96.64                   |
| CK36_1           | 46,454,732         | 43,897,365          | 94.49                   |
| CK36_2           | 47,044,448         | 45,566,330          | 96.86                   |
| CK36_3           | 42,395,790         | 40,298,429          | 95.05                   |
| <i>sfgA</i> 30_1 | 44,333,636         | 38,603,367          | 87.07                   |
| <i>sfgA</i> 30_2 | 45,902,894         | 40,878,091          | 89.05                   |
| <i>sfgA</i> 30_3 | 45,401,428         | 39,258,303          | 86.47                   |
| <i>sfgA</i> 36_1 | 46,551,820         | 40,046,252          | 86.03                   |
| <i>sfgA</i> 36_2 | 46,339,332         | 40,957,455          | 88.39                   |
| <i>sfgA</i> 36_3 | 46,401,238         | 42,469,803          | 91.53                   |

**Table S4.** Transcript abundance of genes involved in *A. flavus* development.

| Gene ID     | Name          | Function                                                                              | $\Delta$ <i>sfgA</i> vs. Control<br>Log <sub>2</sub> Fold Change |         | Up/Down |       |
|-------------|---------------|---------------------------------------------------------------------------------------|------------------------------------------------------------------|---------|---------|-------|
|             |               |                                                                                       | 30 °C                                                            | 36 °C   | 30 °C   | 36 °C |
| AFLA_082850 | <i>brlA</i>   | C <sub>2</sub> H <sub>2</sub> type master<br>regulator of conidiophore<br>development | 1.5525                                                           | 2.0604  | up      | up    |
| AFLA_044800 | <i>con-6</i>  | Conidiation- protein                                                                  | 1.6801                                                           | 1.5497  | up      | up    |
| AFLA_083110 | <i>con-10</i> | Conidiation-specific<br>protein                                                       | 1.6946                                                           | 1.9740  | up      | up    |
| AFLA_014260 | <i>rodB</i>   | Conidial hydrophobin                                                                  | 2.8596                                                           | 2.4726  | up      | up    |
| AFLA_131330 | <i>nsdC</i>   | Sexual development<br>transcription factor                                            | 1.5707                                                           | -1.2657 | up      | down  |
| AFLA_020210 | <i>nsdD</i>   | Sexual development<br>transcription factor                                            | 1.9961                                                           | -1.2916 | up      | down  |
| AFLA_026790 | <i>ppoA</i>   | Balance sexual and<br>asexual<br>development                                          | 1.6422                                                           | -5.4199 | up      | down  |
| AFLA_030430 | <i>ppoC</i>   | Balance sexual and<br>asexual<br>development                                          | -2.8073                                                          | ns      | down    | ns    |

Log<sub>2</sub> Fold Change  $\geq 1$  indicates up-regulated expression and Log<sub>2</sub> Fold Change  $\leq -1$  indicates down-regulated expression. *q*-value < 0.05. ns: no significance

**Table S5.** Transcript abundance of genes that are involved in secondary metabolism (fold change  $\geq 2$ ,  $p$ -value  $\leq 0.05$ ).

| Cluster | Gene name <sup>a</sup> | Gene Description                            | Log <sub>2</sub> FoldChange |
|---------|------------------------|---------------------------------------------|-----------------------------|
| 1       | <b>AFLA_002900</b>     | polyketide synthase, putative               | -1.207276                   |
| 2       | AFLA_004270            | conserved hypothetical protein              | 1.647357                    |
| 3       | AFLA_004440            | ABC multidrug transporter, putative         | 1.134126                    |
| 3       | AFLA_004450            | nonribosomal peptide synthase, putative     | 3.089120                    |
| 4       | <b>AFLA_005440</b>     | nonribosomal peptide synthase, putative     | 1.506663                    |
| 4       | AFLA_005450            | conserved hypothetical protein              | 4.177949                    |
| 4       | AFLA_005460            | cytochrome P450, putative                   | 1.949813                    |
| 6       | AFLA_008760            | multidrug resistance protein, putative      | 2.019229                    |
| 7       | AFLA_009120            | NRPS-like enzyme, putative                  | 1.836413                    |
| 7       | AFLA_009130            | NRPS-like enzyme, putative                  | 1.836413                    |
| 7       | <b>AFLA_009200</b>     | conserved hypothetical protein              | -1.714063                   |
| 8       | <b>AFLA_010020</b>     | nonribosomal peptide synthase, putative     | 4.310527                    |
| 9       | AFLA_010570            | hypothetical protein                        | -1.131355                   |
| 9       | <b>AFLA_010580</b>     | nonribosomal peptide synthase, putative     | 2.205267                    |
| 11      | AFLA_022990            | conserved hypothetical protein              | 1.562315                    |
| 11      | AFLA_023000            | Ankyrin domain protein                      | -2.669890                   |
| 11      | AFLA_023040            | C6 transcription factor, putative           | -1.987002                   |
| 11      | AFLA_023050            | MFS transporter, putative                   | -3.380049                   |
| 11      | AFLA_023070            | integral membrane protein                   | -2.954750                   |
| 12      | <b>AFLA_028720</b>     | NRPS-like enzyme, putative                  | -2.474905                   |
| 15      | AFLA_045450            | ankyrin repeat-containing protein, putative | 1.924687                    |
| 15      | AFLA_045560            | carboxylic acid transport protein           | -2.047874                   |
| 15      | AFLA_045570            | acetyl xylan esterase, putative             | -4.587482                   |
| 16      | <b>AFLA_047190</b>     | L-ornithine N5-oxygenase SidA               | -1.786393                   |
| 17      | AFLA_053840            | conserved hypothetical protein              | 3.604693                    |
| 19      | AFLA_060670            | integral membrane protein                   | -1.600693                   |
| 19      | <b>AFLA_060680</b>     | dimethylallyl tryptophan synthase, putative | -4.745230                   |
| 19      | AFLA_060690            | cytochrome P450, putative                   | -3.827991                   |
| 19      | AFLA_060700            | phenylalanine ammonia-lyase, putative       | -1.863934                   |

|    |                    |                                                                    |           |
|----|--------------------|--------------------------------------------------------------------|-----------|
| 19 | AFLA_060710        | toxin biosynthesis protein, putative                               | -2.594664 |
| 20 | AFLA_062800        | aldo-keto reductase, putative                                      | 2.183065  |
| 20 | AFLA_062840        | conserved hypothetical protein                                     | 1.668746  |
| 21 | AFLA_064410        | conserved hypothetical protein                                     | -2.760077 |
| 21 | AFLA_064430        | macrolide phosphotransferase k,<br>putative                        | -1.653123 |
| 21 | AFLA_064500        | conserved hypothetical protein                                     | -2.026403 |
| 21 | AFLA_064570        | uracil permease, putative                                          | 2.037579  |
| 22 | AFLA_066690        | pyrroline-5-carboxylate reductase,<br>putative                     | 1.651149  |
| 22 | AFLA_066700        | P450 family sporulation-specific N-<br>formyltyrosine oxidase Dit2 | 1.568090  |
| 22 | <b>AFLA_066720</b> | conserved hypothetical protein                                     | -2.026403 |
| 23 | <b>AFLA_066840</b> | hybrid PKS/NRPS enzyme, putative                                   | 1.399046  |
| 23 | AFLA_066880        | monocarboxylate transporter,<br>putative                           | 4.224464  |
| 23 | AFLA_066910        | conserved hypothetical protein                                     | 3.939787  |
| 23 | AFLA_066920        | alcohol dehydrogenase, putative                                    | 4.214583  |
| 23 | AFLA_066940        | O-methyltransferase, putative                                      | 4.005561  |
| 23 | AFLA_066950        | conserved hypothetical protein                                     | -3.512477 |
| 23 | AFLA_066970        | conserved hypothetical protein                                     | -3.972694 |
| 23 | <b>AFLA_066980</b> | polyketide synthase, putative                                      | -2.918739 |
| 24 | AFLA_069320        | ABC multidrug transporter,<br>putative                             | -2.031826 |
| 25 | AFLA_070870        | isopenicillin N synthetase PcbC                                    | -2.421427 |
| 25 | AFLA_070880        | acyl-coenzyme A:Isopenicillin N<br>acyltransferase PenDE           | -4.390697 |
| 26 | <b>AFLA_079400</b> | NRPS-like enzyme, putative                                         | -1.003081 |
| 27 | AFLA_082160        | MFS glucose transporter, putative                                  | -2.611276 |
| 28 | AFLA_082460        | conserved hypothetical protein                                     | 1.682483  |
| 30 | AFLA_090170        | MFS sugar transporter, putative                                    | -2.436712 |
| 30 | AFLA_090210        | amino acid permease, putative                                      | -1.729707 |
| 30 | AFLA_090220        | integral membrane protein                                          | -1.129052 |
| 31 | AFLA_095020        | hypothetical protein                                               | 1.169802  |
| 31 | AFLA_095060        | tyrosinase, putative                                               | 1.258638  |
| 31 | AFLA_095100        | conserved hypothetical protein                                     | 1.276701  |
| 31 | AFLA_095120        | efflux pump antibiotic resistance<br>protein, putative             | -1.224329 |
| 32 | AFLA_096410        | PTH11-like integral membrane<br>protein, putative                  | 2.089426  |
| 34 | AFLA_100290        | aliphatic nitrilase, putative                                      | 1.319157  |
| 34 | AFLA_100310        | oxidoreductase, putative                                           | 2.520110  |
| 37 | AFLA_105170        | O-methyltransferase, putative                                      | 1.706003  |

|    |                    |                                                                |           |
|----|--------------------|----------------------------------------------------------------|-----------|
| 37 | <b>AFLA_105190</b> | NRPS-like enzyme, putative                                     | 1.363957  |
| 39 | AFLA_108540        | NADH oxidase, putative                                         | 1.233473  |
| 41 | <b>AFLA_114820</b> | polyketide synthase, putative                                  | 2.792072  |
| 42 | AFLA_116180        | hypothetical protein                                           | 1.369392  |
| 42 | AFLA_116210        | O-methyltransferase, putative                                  | 1.488287  |
| 43 | AFLA_116510        | conserved hypothetical protein                                 | 1.460287  |
| 43 | AFLA_116560        | NmrA-like family protein                                       | -1.486997 |
| 43 | AFLA_116570        | DUF636 domain protein                                          | -1.522362 |
| 43 | AFLA_116630        | (S)-2-hydroxy-acid oxidase,<br>putative                        | 1.919610  |
| 44 | AFLA_116920        | short-chain dehydrogenase,<br>putative                         | -1.248762 |
| 45 | AFLA_118390        | NCS family nucleoside transporter,<br>putative                 | -3.269836 |
| 45 | AFLA_118450        | conserved hypothetical protein                                 | 1.127589  |
| 45 | AFLA_118460        | amino acid transporter, putative                               | -3.014212 |
| 46 | <b>AFLA_118940</b> | polyketide synthase, putative                                  | 3.272329  |
| 46 | AFLA_118950        | conserved hypothetical protein                                 | 4.115391  |
| 46 | <b>AFLA_118960</b> | polyketide synthase, putative                                  | 3.685196  |
| 47 | AFLA_119120        | beta-lactamase family protein                                  | -1.743214 |
| 48 | <b>AFLA_121520</b> | NRPS-like enzyme, putative                                     | 1.710782  |
| 48 | AFLA_121530        | NADH-dependent flavin<br>oxidoreductase, putative              | 1.335394  |
| 48 | AFLA_121590        | zinc-binding alcohol<br>dehydrogenase, putative<br>short-chain | 2.055708  |
| 48 | AFLA_121630        | dehydrogenase/oxidoreductase,<br>putative                      | 2.841643  |
| 51 | AFLA_127110        | MFS transporter, putative                                      | -1.071045 |
| 52 | <b>AFLA_128060</b> | polyketide synthase, putative                                  | 1.633030  |
| 52 | AFLA_128070        | conserved hypothetical protein                                 | 1.920275  |
| 52 | AFLA_128080        | conserved hypothetical protein                                 | 1.524287  |
| 53 | AFLA_135470        | ornithine decarboxylase, putative                              | 3.899490  |
| 53 | AFLA_135480        | galactose-proton symport, putative                             | 2.657110  |
| 54 | AFLA_139150        | aflY/ hypA/ hypP/ hypothetical<br>protein                      | 7.003634  |
| 54 | AFLA_139160        | aflX/ ordB/ monooxygenase/<br>oxidase                          | 6.215823  |
| 54 | AFLA_139170        | aflW/ moxY/ monooxygenase                                      | 7.080860  |
| 54 | AFLA_139180        | aflV/ cypX/ cytochrome P450<br>monooxygenase                   | 6.721848  |
| 54 | AFLA_139190        | aflK/ vbs/ VERB synthase                                       | 6.415022  |
| 54 | AFLA_139200        | aflQ/ ordA/ ord-1/ oxidoreductase/                             | 6.881341  |

|    |                    |                                                         |           |
|----|--------------------|---------------------------------------------------------|-----------|
|    |                    | cytochrome P450 monooxygenase                           |           |
| 54 | AFLA_139210        | aflP/ omtA/ omt-1/ O-methyltransferase A                | 7.308268  |
| 54 | AFLA_139220        | aflO/ omtB/ dmtA/ O-methyltransferase B                 | 6.955609  |
| 54 | AFLA_139230        | aflI/ avfA/ cytochrome P450 monooxygenase               | 8.764194  |
| 54 | AFLA_139240        | aflLa/ hypB/ hypothetical protein                       | 7.369943  |
| 54 | AFLA_139250        | aflL/ verB/ desaturase/ P450 monooxygenase              | 7.234853  |
| 54 | AFLA_139260        | aflG/ avnA/ ord-1/ cytochrome P450 monooxygenase        | 7.118147  |
| 54 | AFLA_139270        | aflNa/ hypD/ hypothetical protein                       | 1.478176  |
| 54 | AFLA_139280        | aflN/ verA/ monooxygenase                               | 5.581364  |
| 54 | AFLA_139290        | aflMa/ hypE/ hypothetical protein                       | 5.833527  |
| 54 | AFLA_139300        | aflM/ ver-1/ dehydrogenase/ ketoreductase               | 8.132586  |
| 54 | AFLA_139310        | aflE/ norA/ aad/ adh-2/ NOR reductase/ dehydrogenase    | 6.655786  |
| 54 | AFLA_139320        | aflJ/ estA/ esterase                                    | 4.996253  |
| 54 | AFLA_139330        | aflH/ adhA/ short chain alcohol dehydrogenase           | 2.726443  |
| 54 | AFLA_139370        | aflB / fas-1 / fatty acid synthase beta subunit         | 3.413627  |
| 54 | AFLA_139380        | aflA / fas-2 / hexA / fatty acid synthase alpha subunit | 4.018693  |
| 54 | AFLA_139390        | aflD / nor-1 / reductase                                | 7.987878  |
| 54 | AFLA_139400        | aflCa / hypC / hypothetical protein                     | 7.974146  |
| 54 | AFLA_139410        | aflC / pksA / pksL1 / polyketide synthase               | 4.605925  |
| 54 | <b>AFLA_139360</b> | aflR / apa-2 / afl-2 / transcription activator          | 1.002267  |
| 56 | AFLA_096040        | conserved hypothetical protein                          | -1.927421 |

<sup>a</sup> The bold genes represent backbone genes in each cluster.



**Table S6.** Transcript abundance of genes that are involved in environmental stresses (fold change  $\geq 2$ ,  $p$ -value  $\leq 0.05$ ).

| Gene name   | Gene Description                                                   | Log2FoldChange | Stress    |
|-------------|--------------------------------------------------------------------|----------------|-----------|
| AFLA_010860 | F-box and wd40 domain protein, putative                            | 0.3852646      | osmotic   |
| AFLA_019280 | peroxiredoxin, putative                                            | 0.289199752    | osmotic   |
| AFLA_022380 | molecular chaperone Hsp70                                          | 0.487892937    | osmotic   |
| AFLA_024540 | sensory transduction histidine kinase, putative                    | 2.450629368    | osmotic   |
| AFLA_028490 | conserved hypothetical protein                                     | 2.107462659    | osmotic   |
| AFLA_030340 | RING finger domain protein, putative                               | 0.086038116    | osmotic   |
| AFLA_045750 | antigenic mitochondrial protein HSP60, putative                    | 0.403137136    | osmotic   |
| AFLA_052860 | chaperone/heat shock protein Hsp12, putative                       | 2.836924545    | osmotic   |
| AFLA_086540 | glycine-rich RNA-binding protein, putative                         | 0.349908569    | osmotic   |
| AFLA_091060 | allergen Asp F3                                                    | 3.088393794    | osmotic   |
| AFLA_095980 | mannosylphosphate transferase (Mnn4), putative                     | 2.905110109    | osmotic   |
| AFLA_104660 | sensory transduction histidine kinase, putative                    | 2.44339302     | osmotic   |
| AFLA_108790 | aldehyde dehydrogenase AldA, putative                              | 0.202696334    | osmotic   |
| AFLA_109500 | 2-deoxyglucose-6-phosphate phosphatase, putative                   | 10.31545422    | osmotic   |
| AFLA_004050 | Mst3-like protein kinase, putative                                 | 0.44047059     | osmotic   |
| AFLA_039130 | sensor histidine kinase/response regulator TcsB/Sln1, putative     | 0.194793268    | osmotic   |
| AFLA_073630 | Ste20-like serine/threonine protein kinase, putative               | 0.424266974    | osmotic   |
| AFLA_092700 | protein tyrosine phosphatase Pps1, putative                        | 0.216988004    | osmotic   |
| AFLA_103480 | MAP kinase kinase Ste7                                             | 0.410127921    | osmotic   |
| AFLA_006830 | scramblase family protein                                          | 1.380665379    | oxidative |
| AFLA_016800 | thioredoxin, putative                                              | 2.019818729    | oxidative |
| AFLA_019280 | peroxiredoxin, putative                                            | -1.789861781   | oxidative |
| AFLA_021100 | prostaglandin G/H synthase 2/cyclooxygenase 2, pgh2/cox2, putative | 2.588080405    | oxidative |

|             |                                                                       |              |           |
|-------------|-----------------------------------------------------------------------|--------------|-----------|
| AFLA_026790 | fatty acid oxygenase PpoA,<br>putative                                | 1.642179042  | oxidative |
| AFLA_027950 | formamidopyrimidine-DNA<br>glycosylase, putative                      | -1.521337204 | oxidative |
| AFLA_030430 | fatty acid oxygenase PpoC,<br>putative                                | -2.807324701 | oxidative |
| AFLA_036840 | 6-phosphogluconate<br>dehydrogenase Gnd1, putative                    | 1.319244861  | oxidative |
| AFLA_039650 | NADH-cytochrome B5<br>reductase, putative                             | 2.639498544  | oxidative |
| AFLA_050220 | conserved hypothetical protein                                        | 2.973096451  | oxidative |
| AFLA_051530 | methylmalonate-semialdehyde<br>dehydrogenase, putative                | -2.1724422   | oxidative |
| AFLA_052650 | hypothetical protein                                                  | -1.4368895   | oxidative |
| AFLA_052660 | hypothetical protein                                                  | -1.656113973 | oxidative |
| AFLA_052670 | RNA recognition motif (rrm)<br>domain containing protein,<br>putative | -1.668283749 | oxidative |
| AFLA_052860 | chaperone/heat shock protein<br>Hsp12, putative                       | 1.504327779  | oxidative |
| AFLA_056500 | NADH-ubiquinone<br>oxidoreductase subunit B17.2,<br>putative          | -1.435878958 | oxidative |
| AFLA_079910 | glutathione peroxidase Hyr1,<br>putative                              | 2.342951718  | oxidative |
| AFLA_080370 | RNA binding protein                                                   | 1.1682823    | oxidative |
| AFLA_091060 | allergen Asp F3                                                       | 1.626856719  | oxidative |
| AFLA_096210 | catalase, putative                                                    | 1.157181053  | oxidative |
| AFLA_110690 | cytochrome c peroxidase Ccp1,<br>putative                             | -1.55709287  | oxidative |
| AFLA_120260 | nitroreductase family protein,<br>putative                            | 2.853295979  | oxidative |
| AFLA_121320 | conserved hypothetical protein                                        | 1.108057684  | oxidative |
| AFLA_123710 | fatty acid repression mutant<br>protein, putative                     | 3.068695805  | oxidative |
| AFLA_129110 | sensory transduction histidine<br>kinase, putative                    | 1.086115064  | oxidative |
| AFLA_001640 | glycosyl hydrolase, putative                                          | 4.14716637   | cell wall |
| AFLA_005360 | conserved hypothetical protein                                        | 1.674285503  | cell wall |
| AFLA_014130 | conserved hypothetical protein                                        | 1.707869767  | cell wall |
| AFLA_016890 | Rho GTPase activator (Lrg11),<br>putative                             | -1.066861467 | cell wall |
| AFLA_018140 | mannose-6-phosphate<br>isomerase, class I                             | -1.726886662 | cell wall |

|             |                                                            |              |           |
|-------------|------------------------------------------------------------|--------------|-----------|
| AFLA_018750 | phosphatidylinositol glycan,<br>putative                   | 3.333858289  | cell wall |
| AFLA_020500 | Rho-like small GTPase, putative                            | 1.54340555   | cell wall |
| AFLA_020890 | clathrin-coated vesicle protein<br>(Bud7), putative        | -2.363906245 | cell wall |
| AFLA_022640 | protein O-mannosyl transferase                             | -1.468678457 | cell wall |
| AFLA_023340 | pectinesterase precursor,<br>putative                      | -3.77602232  | cell wall |
| AFLA_023430 | glycosyl transferase, putative                             | -2.092490598 | cell wall |
| AFLA_023460 | alpha-1,3-glucan synthase Ags1                             | 1.415947584  | cell wall |
| AFLA_023600 | cell wall protein PhiA                                     | 2.97972861   | cell wall |
| AFLA_024280 | cell wall glycosyl hydrolase<br>Dfg5, putative             | -1.033150062 | cell wall |
| AFLA_024540 | sensory transduction histidine<br>kinase, putative         | 1.293152308  | cell wall |
| AFLA_026770 | alpha-1,6-mannosyltransferase<br>subunit, putative         | -1.339398526 | cell wall |
| AFLA_027500 | mannose-1-phosphate<br>guanylyltransferase                 | -2.435870023 | cell wall |
| AFLA_028260 | exo-beta-1,3-glucanase (Exg1),<br>putative                 | 1.238299451  | cell wall |
| AFLA_039410 | cell wall serine-threonine-rich<br>galactomannoprotein Mp1 | -2.239528857 | cell wall |
| AFLA_042780 | chitin synthase A                                          | 1.018933507  | cell wall |
| AFLA_042830 | mannose-6-phosphate<br>isomerase, putative                 | 1.680506312  | cell wall |
| AFLA_044970 | pectate lyase precursor,<br>putative                       | -1.785286741 | cell wall |
| AFLA_045180 | NAD dependent<br>epimerase/dehydratase,<br>putative        | 1.071146872  | cell wall |
| AFLA_050610 | acid phosphatase PHOa                                      | -3.271287478 | cell wall |
| AFLA_052510 | WSC domain protein, putative                               | -1.294505777 | cell wall |
| AFLA_052810 | 1,3-beta-glucanosyltransferase,<br>putative                | 1.391643467  | cell wall |
| AFLA_053690 | alpha-L-fucosidase 2 precursor,<br>putative                | -1.714957315 | cell wall |
| AFLA_055980 | mannosyl-oligosaccharide<br>glucosidase, putative          | -1.892672392 | cell wall |
| AFLA_056470 | conserved hypothetical protein                             | 3.377588461  | cell wall |
| AFLA_060780 | hydrophobin family protein                                 | -1.188748914 | cell wall |
| AFLA_061610 | 24-dehydrocholesterol<br>reductase, putative               | 1.747873309  | cell wall |
| AFLA_065600 | translation factor, putative                               | -4.144452498 | cell wall |

|             |                                                                   |              |           |
|-------------|-------------------------------------------------------------------|--------------|-----------|
| AFLA_068080 | cytosolic Cu/Zn superoxide<br>dismutase, putative                 | 1.357719977  | cell wall |
| AFLA_069580 | DUF907 domain protein                                             | -1.286719056 | cell wall |
| AFLA_070170 | lysosomal alpha-glucosidase,<br>putative                          | -2.137576192 | cell wall |
| AFLA_073190 | ab-hydrolase associated lipase,<br>putative                       | -1.074510245 | cell wall |
| AFLA_073500 | conserved hypothetical protein                                    | -1.141994216 | cell wall |
| AFLA_075860 | conserved hypothetical protein                                    | 2.416400334  | cell wall |
| AFLA_077590 | conserved hypothetical protein                                    | 2.543761827  | cell wall |
| AFLA_078300 | chitin synthase activator (Chs3),<br>putative                     | -1.637301246 | cell wall |
| AFLA_081420 | extracellular SCP domain<br>protein Pry1, putative                | 1.381097562  | cell wall |
| AFLA_081820 | glycosyl hydrolase, putative                                      | 1.986700523  | cell wall |
| AFLA_081980 | ferulic acid esterase (FaeA),<br>putative                         | -1.750444026 | cell wall |
| AFLA_083360 | extracellular cell wall glucanase<br>Crf1/allergen Asp F9         | 1.485205255  | cell wall |
| AFLA_085140 | extracellular thaumatin domain<br>protein, putative               | 2.717912754  | cell wall |
| AFLA_086360 | extracellular exo-<br>polygalacturonase, putative                 | -1.665482538 | cell wall |
| AFLA_087880 | integral membrane protein                                         | 1.676984007  | cell wall |
| AFLA_103040 | protein mannosyltransferase 1                                     | -1.879198663 | cell wall |
| AFLA_104660 | sensory transduction histidine<br>kinase, putative                | 1.28888594   | cell wall |
| AFLA_104880 | glycosyl hydrolase, putative                                      | -2.845867136 | cell wall |
| AFLA_106450 | GPI anchored CFEM domain<br>protein                               | 2.068224179  | cell wall |
| AFLA_107460 | mannosyltransferase PMTI                                          | -2.029910509 | cell wall |
| AFLA_107790 | glucan 1,3-beta-glucosidase<br>precursor, putative                | 3.655910935  | cell wall |
| AFLA_114760 | chitin synthase B                                                 | 1.093645281  | cell wall |
| AFLA_116700 | mannan endo-1,6-alpha-<br>mannosidase DCW1 precursor,<br>putative | 1.640087707  | cell wall |
| AFLA_116810 | alpha-1,3-glucan synthase Ags3                                    | 2.337102969  | cell wall |
| AFLA_117050 | RAC GTPase, putative                                              | 1.544198732  | cell wall |
| AFLA_119860 | pectin lyase, putative                                            | 1.778960284  | cell wall |
| AFLA_121370 | 1,3-beta-glucanosyltransferase,<br>putative                       | 2.066169112  | cell wall |

|             |                                                            |              |           |
|-------------|------------------------------------------------------------|--------------|-----------|
| AFLA_122130 | mannan endo-1,6-alpha-mannosidase DCW1 precursor, putative | -1.068354774 | cell wall |
| AFLA_122480 | extracellular exo-polygalacturonase, putative              | 1.253653238  | cell wall |
| AFLA_123410 | GPI anchored cell wall protein, putative                   | 1.145804622  | cell wall |
| AFLA_126870 | conserved hypothetical protein                             | 1.259492496  | cell wall |
| AFLA_127350 | N-acetylglucosamine-phosphate mutase                       | -2.137037927 | cell wall |
| AFLA_128120 | cell wall glucanase, putative                              | 1.134923862  | cell wall |
| AFLA_129100 | exo-beta-1,3-glucanase, putative                           | -1.252829009 | cell wall |
| AFLA_130240 | DUF907 domain protein                                      | -1.149572683 | cell wall |
| AFLA_134770 | beta-1,6 glucan synthetase (Kre6), putative                | -1.743375858 | cell wall |
| AFLA_137460 | glycosyl transferase, putative                             | -4.627509824 | cell wall |

---

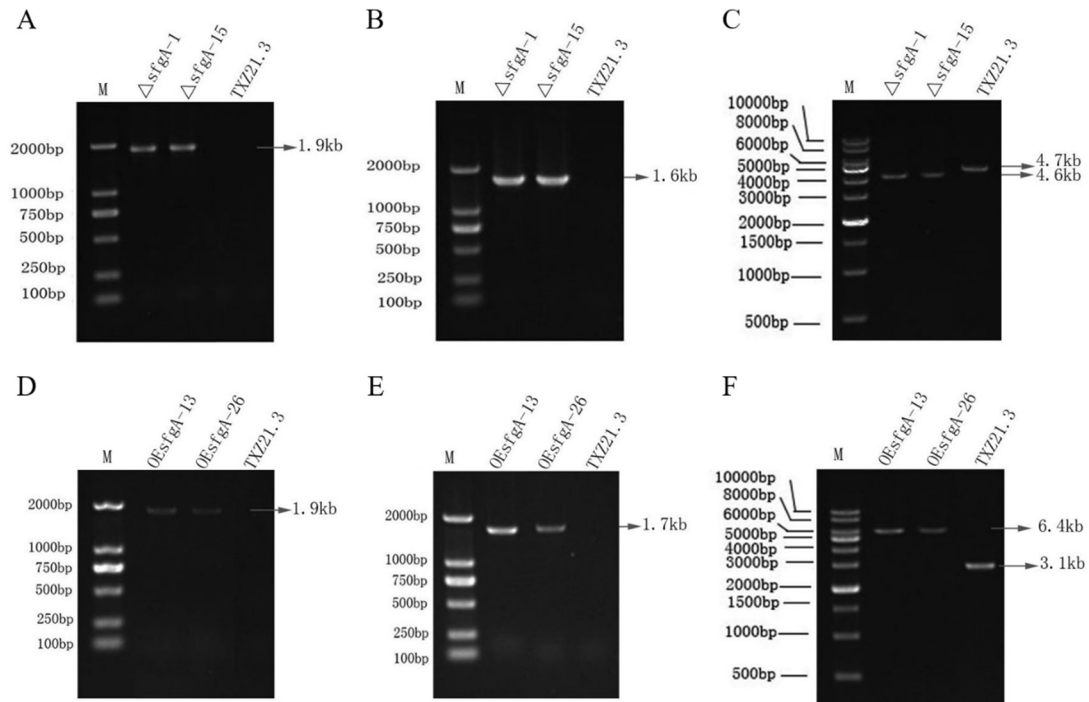

**Figure S1.** PCR confirmation of the *sfgA* deletion (A–C) and over-expression (D–F) transformants. (A) Primers P19 and P20: *sfgA* 5' UTR - *argB*. (B) Primers P21 and P22: *argB* - *sfgA* 3' UTR. (C) Primers P23 and P24: *sfgA* 5' - *sfgA* 3'. (D) Primers P25 and P26: *sfgA* 5' UTR - *argB*. (E) Primers P27 and P28: *gpdA* - *sfgA*. (F) Primers P29 and P30: *sfgA* 5' - *sfgA*.

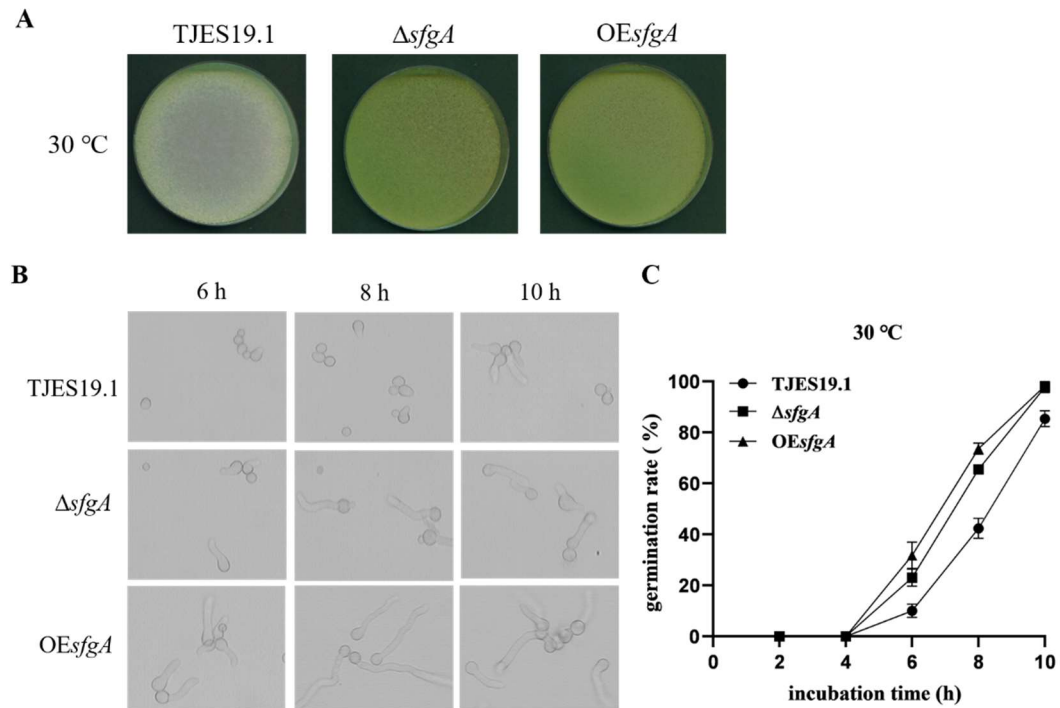

**Figure S2.** *sfgA* affects conidia growth and spore germination of *A. flavus*. (A) Conidia growth of *sfgA* mutants on PDAU plates after 2 days incubation. (B) Examination of spore germination in PDBUU culture. (C) Comparison of germination rate of each strain.

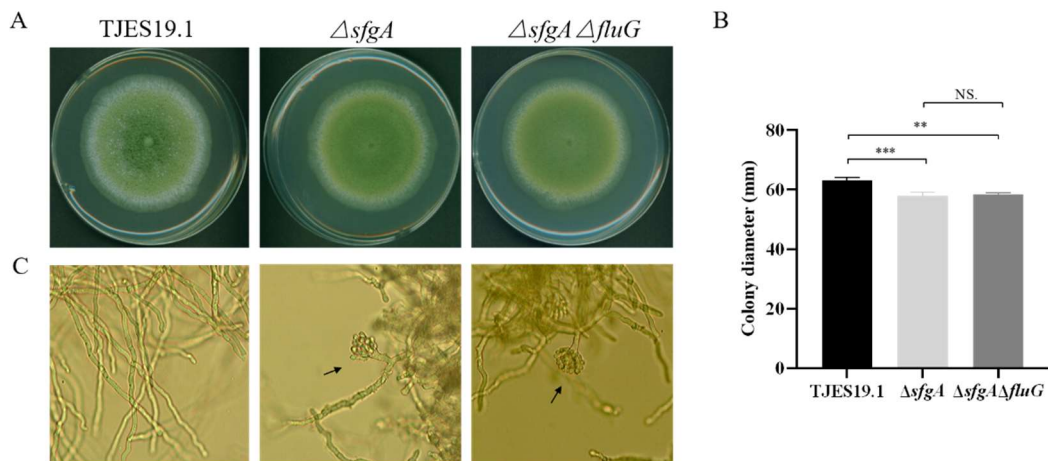

**Figure S3.** Phenotypes of  $\Delta sfgA \Delta fluG$  in *A. flavus*. (A) Conidia growth of control strain,  $\Delta sfgA$  and  $\Delta sfgA \Delta fluG$  mutants on PDAU plates after 5 days incubation. (B) Quantitative analysis of colony diameter shown in (A). \*\*  $p \leq 0.01$ ; \*\*\*  $p \leq 0.001$ ; NS: not significant. (C) Conidiophore formation in PDBUU culture was photographed at 14 h of incubation (Magnification, 200 $\times$ ).

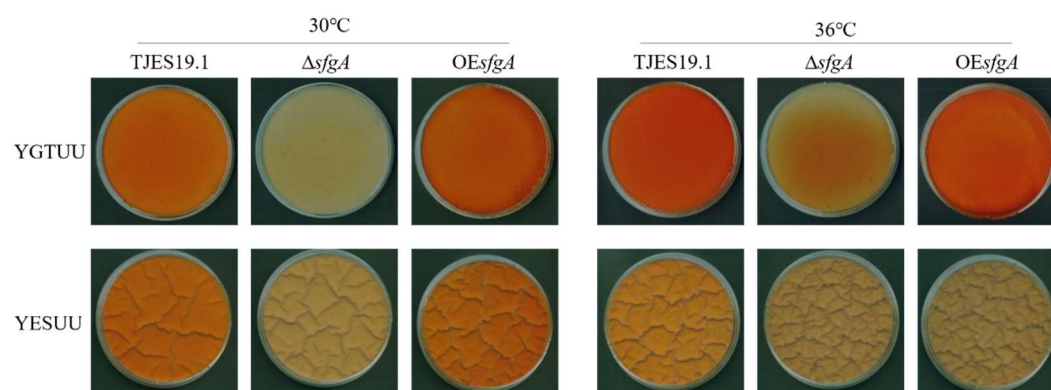

**Figure S4.** Determination of kojic acid production in solid YGTUU and YESUU medium for 36 h via colorimetric method.

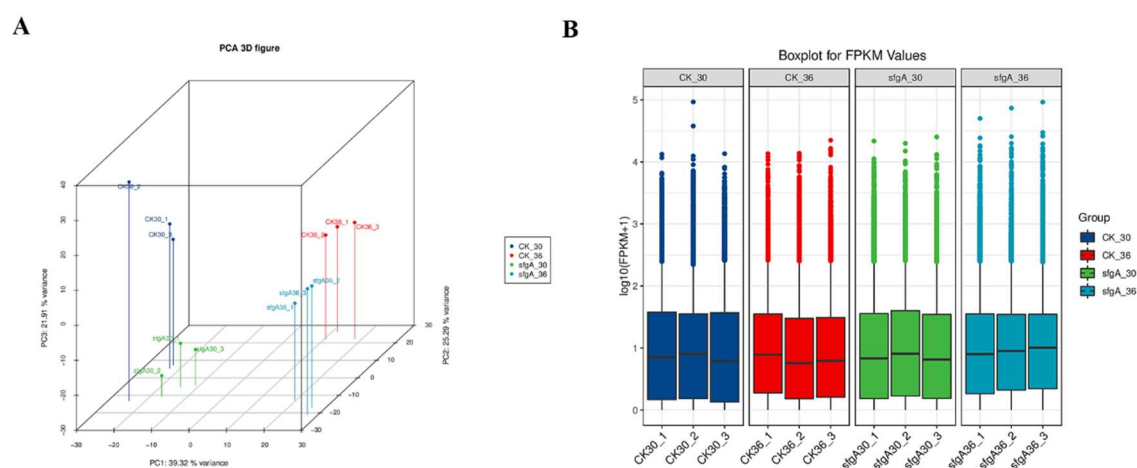

**Figure S5.** Overview of RNA-seq results. (A) PCA 3D plot of four groups. (B) Boxplot of overall expression levels in the four groups.
